# Supplementary material
Source: PubMed Central journal article supplement (PMC7792549)
Supplement: NIHMS899672-supplement-3.pdf [file NIHMS899672-supplement-3.pdf]

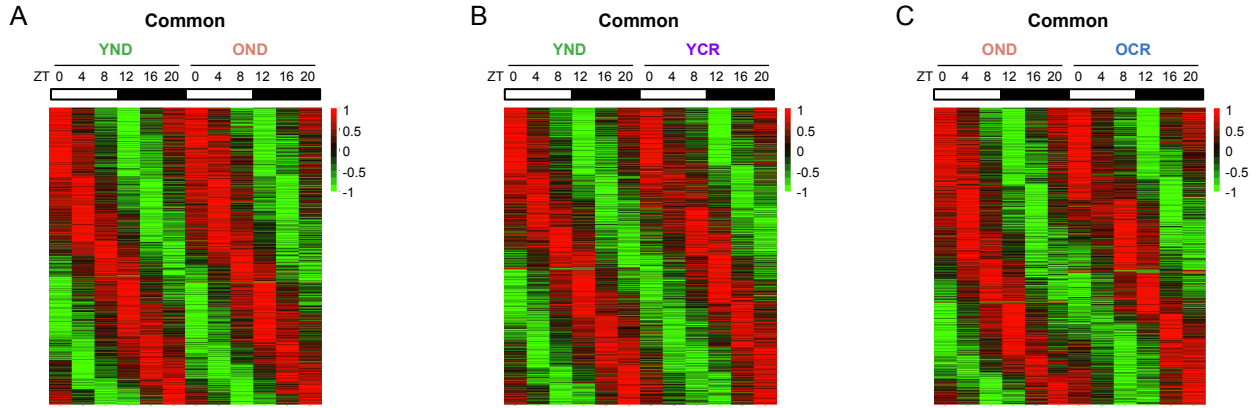

**D** Common circadian genes within YND and OND comparison

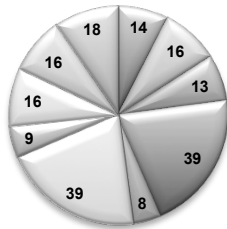

- ▣ circadian regulation of gene expression
- ▣ response to unfolded protein
- ▣ protein N-linked glycosylation
- ▣ autophagy
- ▣ NAD metabolic process
- ▣ DNA repair
- ▣ histone H3 acetylation
- ▣ internal peptidyl-lysine acetylation
- ▣ response to glucose
- ▣ cell cycle checkpoint

**E** Common circadian genes within YND and YCR comparison

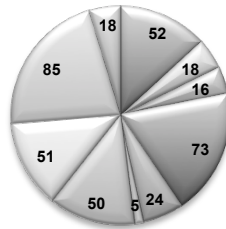

- ▣ steroid metabolic process
- ▣ circadian regulation of gene expression
- ▣ cell redox homeostasis
- ▣ chromatin modification
- ▣ internal peptidyl-lysine acetylation
- ▣ NAD biosynthetic process
- ▣ autophagy
- ▣ Wnt signaling pathway
- ▣ RNA processing
- ▣ signal transduction by p53 class mediator

**F** Common circadian genes within OND and OCR comparison

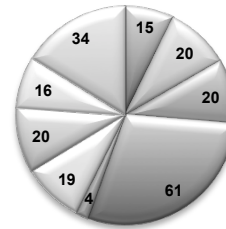

- ▣ circadian regulation of gene expression
- ▣ internal protein amino acid acetylation
- ▣ response to carbohydrate
- ▣ RNA processing
- ▣ NAD biosynthetic process
- ▣ protein folding
- ▣ response to insulin
- ▣ histone acetylation
- ▣ autophagy

Figure S1
