# Supplementary material
Source: PubMed Central journal article supplement (PMC7792549)
Supplement: NIHMS899672-supplement-7.pdf [file NIHMS899672-supplement-7.pdf]

### YND-specific circadian genes

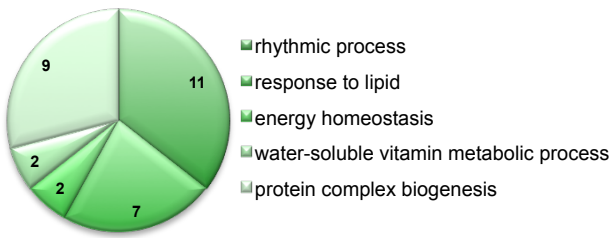

### OND-specific circadian genes

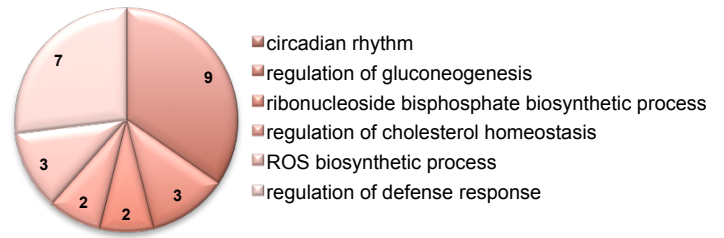

### YCR-specific circadian genes

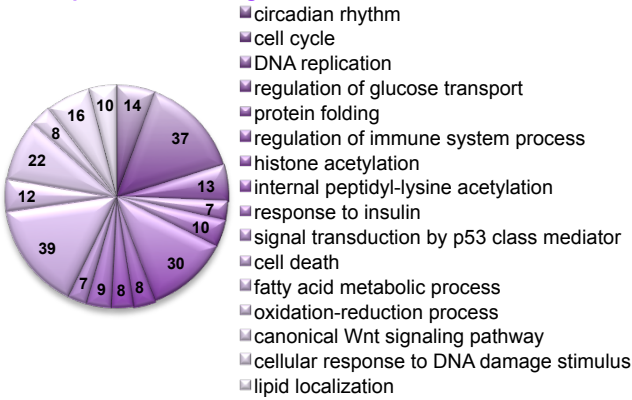

### OCR-specific circadian genes

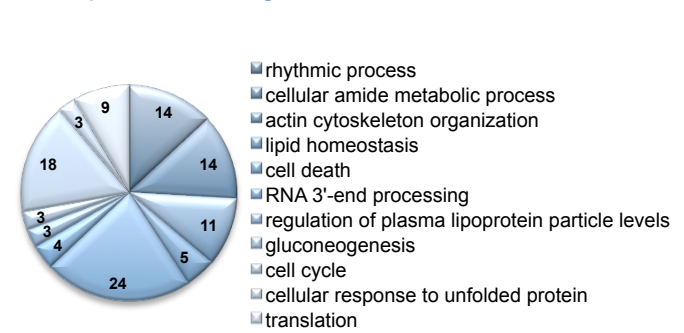

Figure S5
