# Supplementary material
Source: PubMed Central journal article supplement (PMC7792549)
Supplement: NIHMS899672-supplement-10.pdf [file NIHMS899672-supplement-10.pdf]

**Table S1. Primers used for qPCR (Related to Fig. 1, 5, 7, S2 and S3, and STAR Methods).**

| <b>Gene</b>                       | <b>Forward (5' - 3')</b>  | <b>Reverse (5' - 3')</b>  |
|-----------------------------------|---------------------------|---------------------------|
| <i>Bmal1</i>                      | GCAGTGCCACTGACTACCAAGA    | TCCTGGACATTGCATTGCAT      |
| <i>Clock</i>                      | ACCACAGCAACAGCAACAAC      | GGCTGCTGAACTGAAGGAAG      |
| <i>Per1</i>                       | ACCAGCGTGTCATGATGACATA    | GTGCACAGCACCCAGTTCCC      |
| <i>Per2</i>                       | CGCCTAGAATCCCTCCTGAGA     | CCACCGGCCTGTAGGATCT       |
| <i>Per3</i>                       | CATACCAGGTGCCCGAGA        | GCTGCTGTTCCATGCTCTG       |
| <i>Cry1</i>                       | CAGACTCACTCACTCAAGCAAGG   | TCAGTTACTGCTCTGCCGCTGGAC  |
| <i>Rev-erb<math>\alpha</math></i> | GGGCACAAGCAACATTACCA      | CACGTCCCACACACCTTAC       |
| <i>Rev-erb<math>\beta</math></i>  | CAGCATGATCAGGTCAATCTGT    | AGCAAATCGTACCATTAACCTC    |
| <i>Rora</i>                       | ACCGTGCCATGGCAGAAC        | TTTCCAGGTGGGATTTGGAT      |
| <i>Rorc</i>                       | TGCAAGACTCATCGACAAGG      | AGGGGATTCAACATCAGTGC      |
| <i>Dbp</i>                        | AATGACCTTTGAACCTGATCCCGCT | GCTCCAGTACTTCTCATCCTTCTGT |
| <i>Pck1</i>                       | TGTTGGCTGGCTCTCACTGAC     | GGGAACCTGGCGTTGAATGC      |
| <i>Por</i>                        | GCCGTCTGAAGAGCTACGAG      | CTTCCGGTTCGTGGTGAC        |
| <i>Nampt</i>                      | GGTCATCTCCCGATTGAAGT      | TCAATCCAATTGGTAAGCCA      |
| <i>Gck</i>                        | GATCCGGGAAGAGAAGCAAG      | GACAGGGATGAGGGACAGAG      |
| <i>Pklr</i>                       | AATATCACCCAGGTCGTTGC      | GAAACCACCGTGTTCCTT        |
| <i>Fasn</i>                       | ATCCTGGAACGAGAACACGATCT   | AGAGACGTGTCACTCCTGGACTT   |
| <i>Acaca</i>                      | TGGTATTGGGGCTTACCTTG      | AAGCTGGTTGTTGGAGGTGT      |
| <i>Scd1</i>                       | TTCCCTCCTGCAAGCTCTAC      | CAGAGCGCTGGTCATGTAGT      |
| <i>Cdkn1a</i>                     | TGTCCAATCCTGGTGATGT       | CAACTGCTCACTGTCCAC        |
| <i>Hsp90aa1</i>                   | TGGCTTGTTTTCCAAAGTCC      | CAGAATGTGATTGGGCACTG      |
| <i>Hspa4</i>                      | AGCTTCCTGAGATGGACATTG     | CGAGGTCCCCTAAAACTGA       |
| <i>Il6ra</i>                      | ATGCTCCCTGAATGATCACC      | ACTCACAGATGGCGTTGACA      |
| <i>Ahcy</i>                       | ACATGACCGTGGAGACTGCT      | CGCTGCATGGTCCTGAGTA       |
| <i>Dnmt3b</i>                     | ATGATCGATGCCATCAAGGT      | GGGAAGCCGAAGATCCTG        |
| <i>Pdk4</i>                       | GAGCTGGTATATCCAGAGCCTGAT  | CGAACTTTGACCAGCGTGTCT     |
| <i>Sirt1</i>                      | CAGTGTGATGGTTCCTTTGC      | CACCGAGGAACTACCTGAT       |
| <i>18S rRNA</i>                   | CGCCGCTAGAGGTGAAATTC      | CGAACCTCCGACTTTTCGTTCT    |

**Table S2. Primers used for CHIP-qPCR (Related to Fig. 5 and STAR Methods)**

| <b>Promoter</b> | <b>Forward (5' - 3')</b> | <b>Reverse (5' - 3')</b>      |
|-----------------|--------------------------|-------------------------------|
| <i>Cry1</i>     | GAGCTCGTGTCCGTTTCGT      | GGACACGCATACCTTCCAG           |
| <i>Per2</i>     | AGCATCTTCATTGAGGAACCCGGG | CTCCGCTGTCACATAGTGGAAAACGTGAC |
| <i>Pck1</i>     | CCATGGCTATGATCCAAAGG     | CCCTGCCTACCTTTCTTCCT          |
| <i>Por</i>      | TTCCGAGGAGAGGATGAGGG     | TCTTGCTTTTGCTCCCCTTCT         |
