# Supplementary material
Source: PubMed Central journal article supplement (PMC7792549)

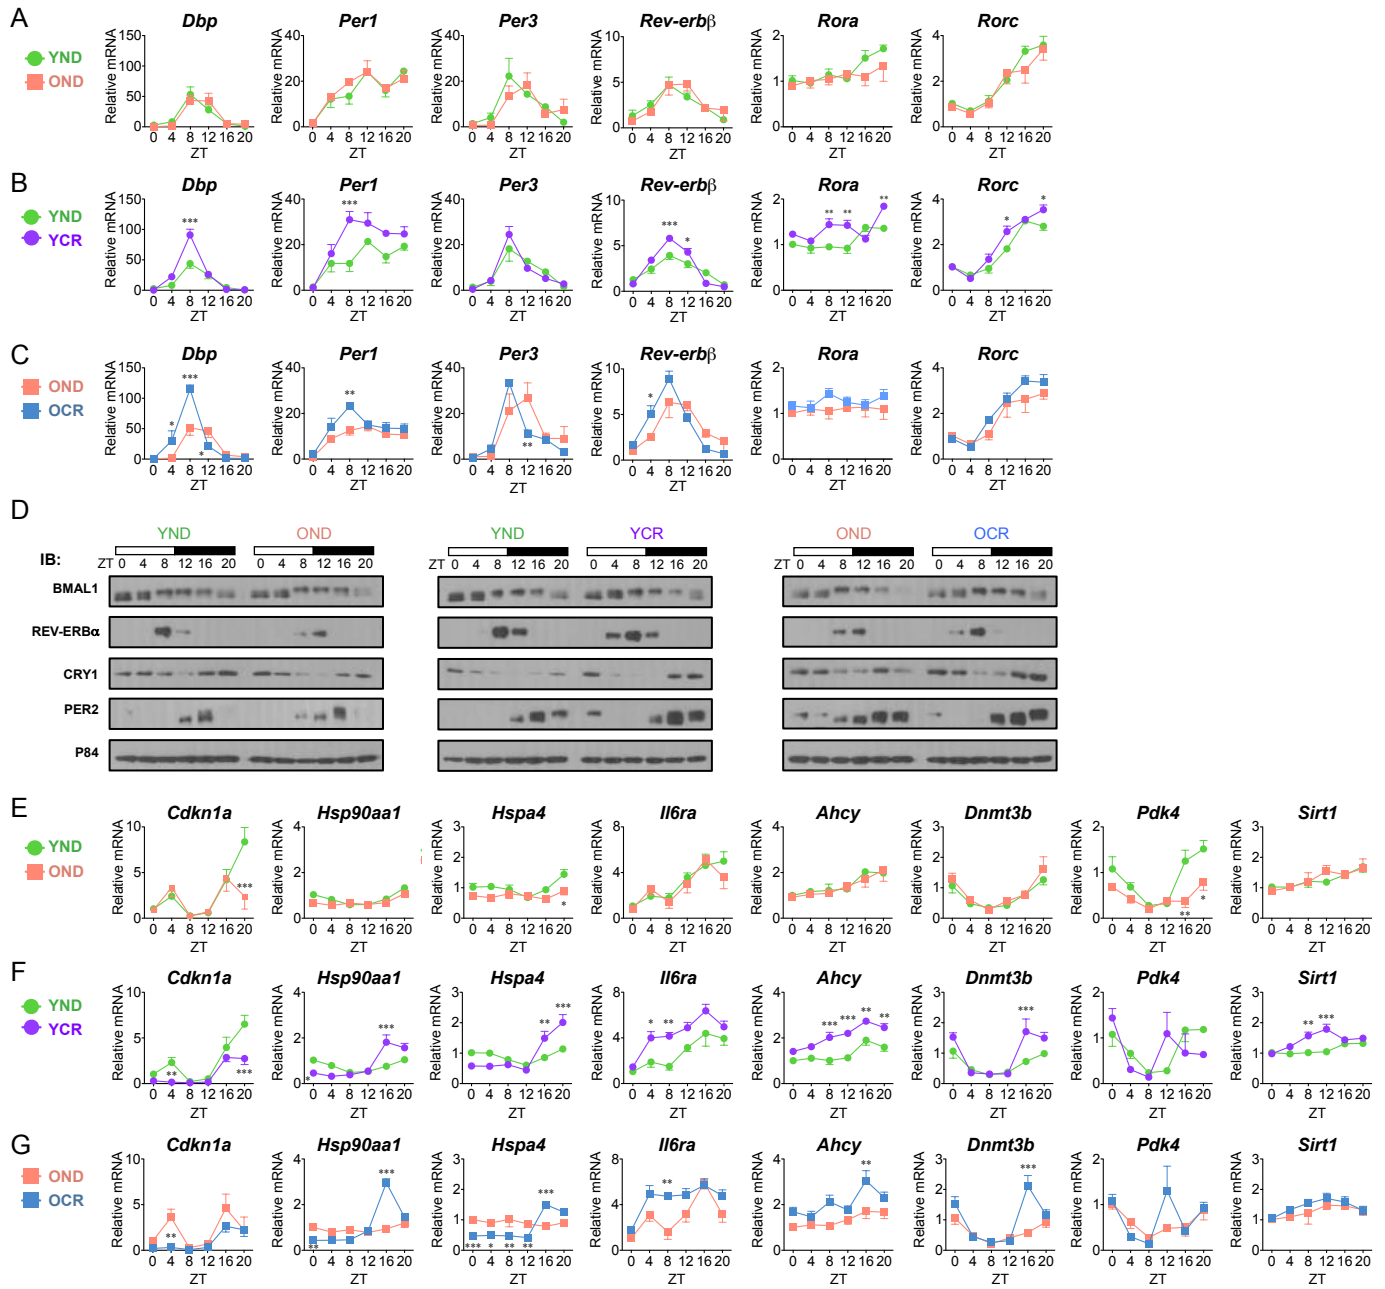

Figure S2

Supplement: NIHMS899672-supplement-4.pdf [file NIHMS899672-supplement-4.pdf]

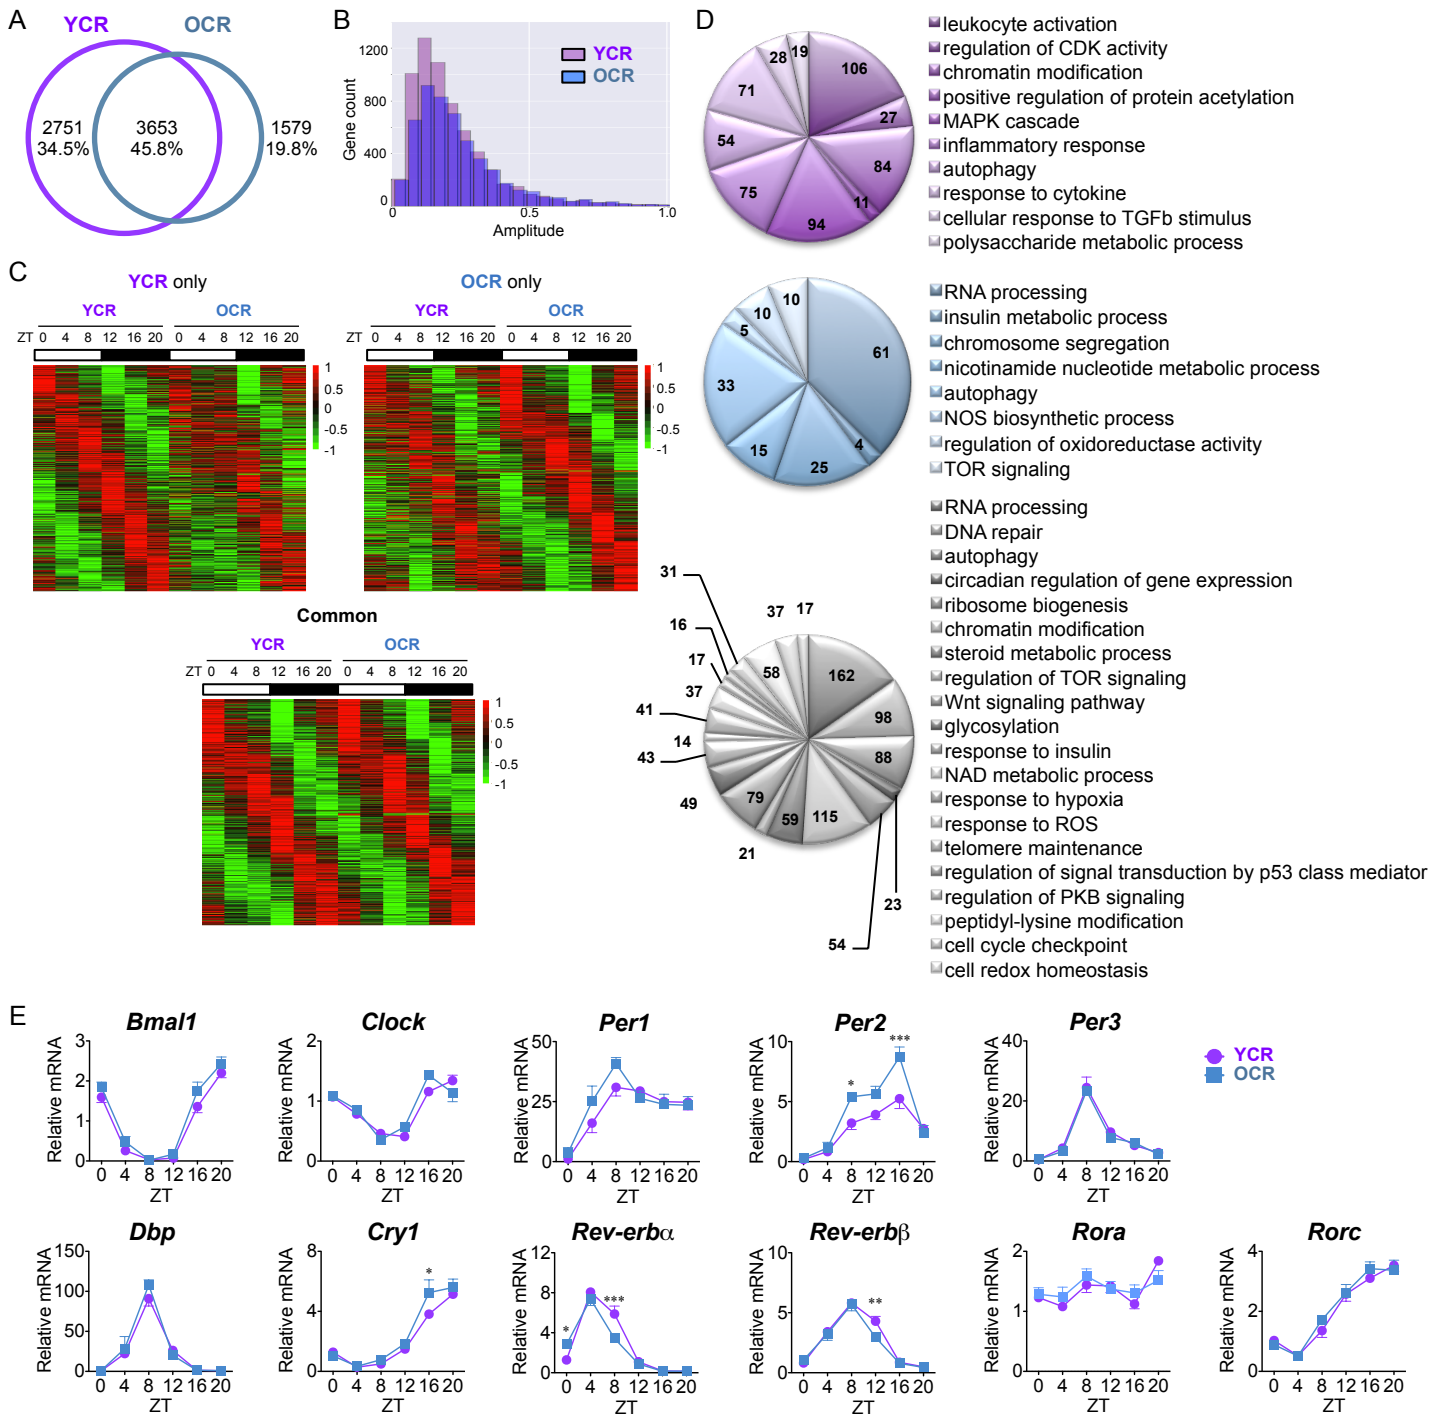

Figure S3

Supplement: NIHMS899672-supplement-5.pdf [file NIHMS899672-supplement-5.pdf]

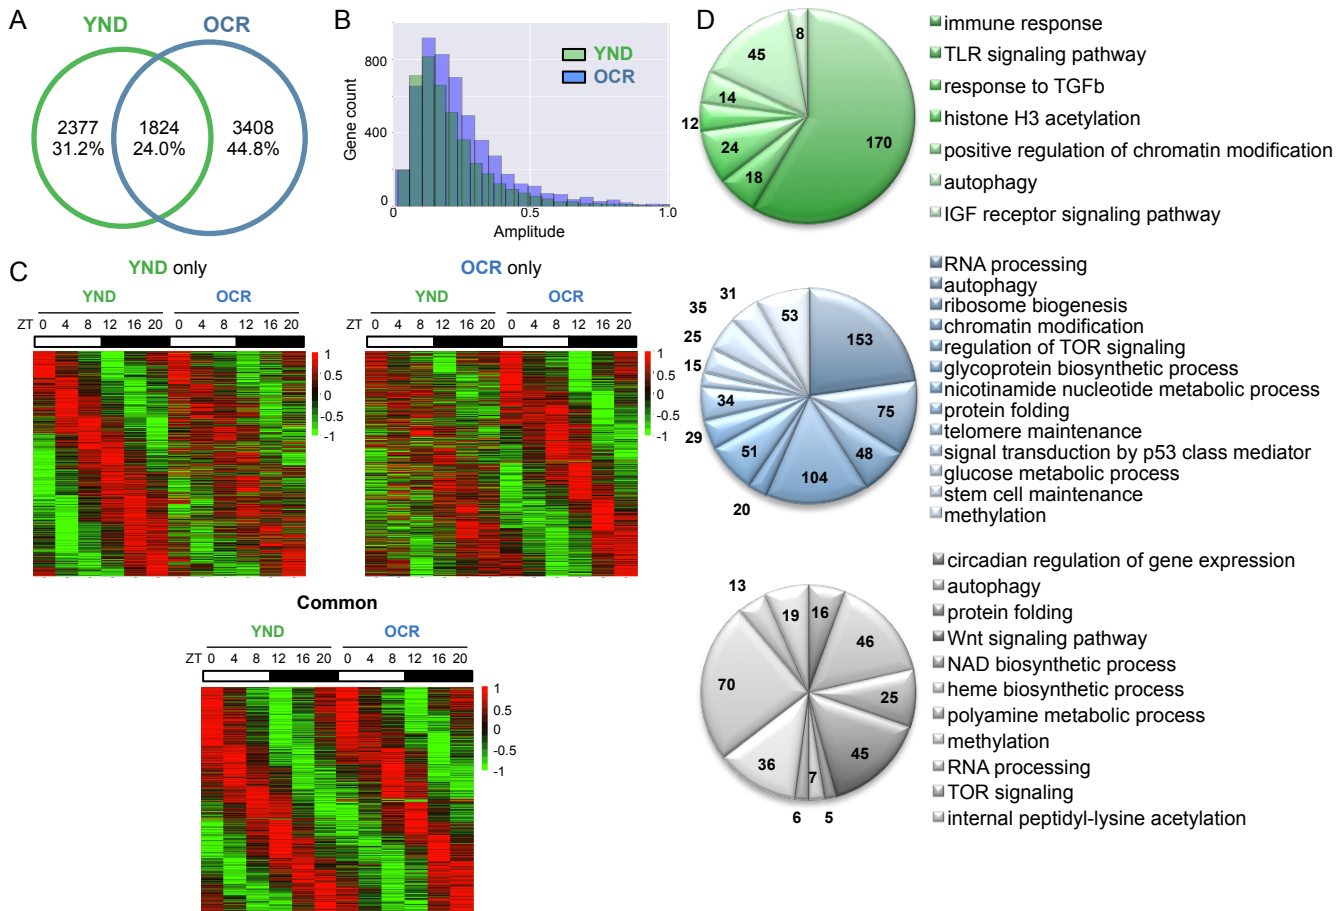

Figure S4

Supplement: NIHMS899672-supplement-6.pdf [file NIHMS899672-supplement-6.pdf]

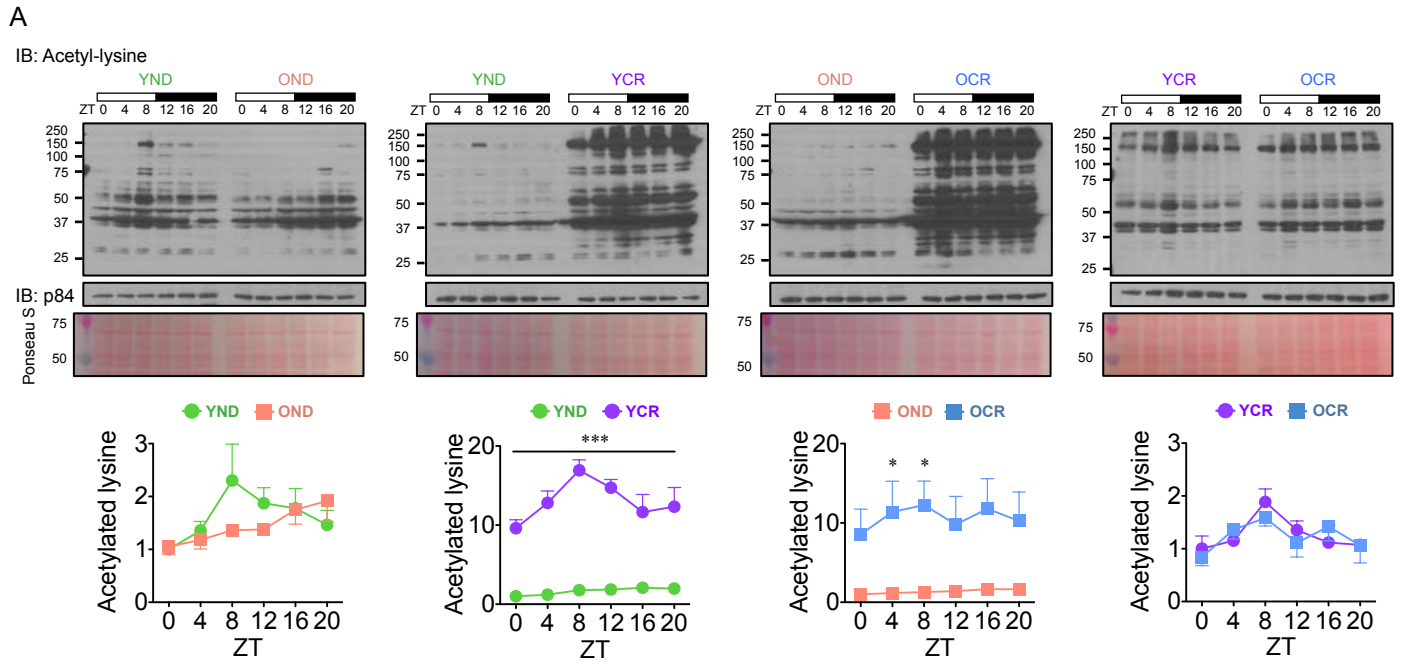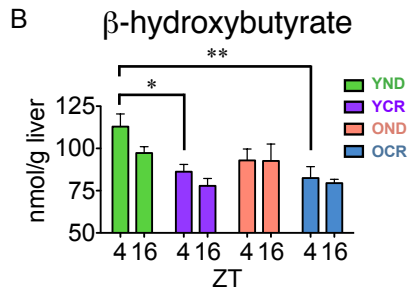

Figure S6

Supplement: NIHMS899672-supplement-8.pdf [file NIHMS899672-supplement-8.pdf]

**YND versus OND**

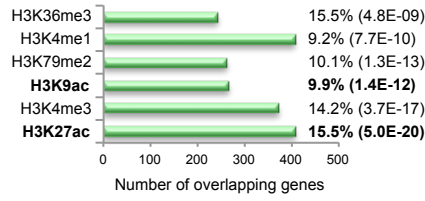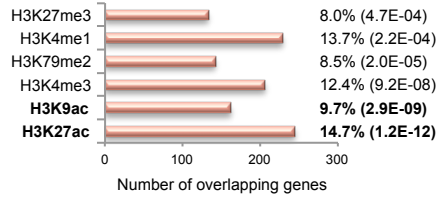

**YND versus YCR**

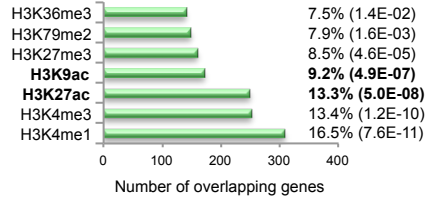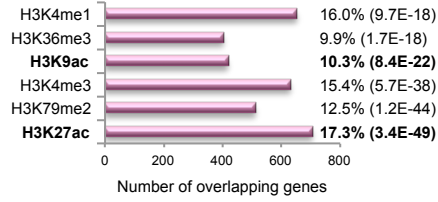

**OND versus OCR**

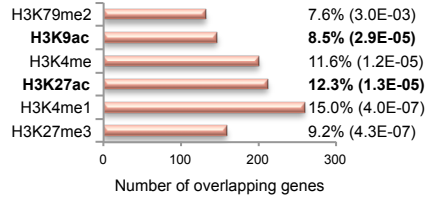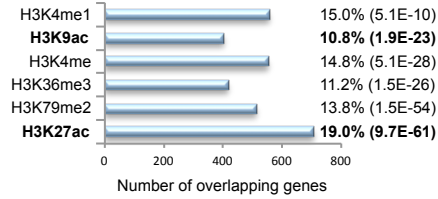

Figure S7

Supplement: NIHMS899672-supplement-9.pdf [file NIHMS899672-supplement-9.pdf]
